1 **Dorsoventral dissociation of Hox gene expression underpins**  
2 **the diversification of molluscs**

3 Pin Huan<sup>1,2,3‡</sup>, Qian Wang<sup>1,3‡</sup>, Sujian Tan<sup>1</sup>, Baozhong Liu<sup>1,2,3\*</sup>

4 *1, Key Laboratory of Experimental Marine Biology, Center for Ocean Mega-Science,*  
5 *Institute of Oceanology, Chinese Academy of Sciences, 266071, Qingdao, China;*

6 *2, Laboratory for Marine Biology and Biotechnology, Qingdao National Laboratory*  
7 *for Marine Science and Technology, 266000, Qingdao, China;*

8 *3, University of Chinese Academy of Sciences, 100039, Beijing, China;*

9 ‡: These authors contributed equally to this work.

10 \*: Corresponding author: Baozhong Liu

11 Key Laboratory of Experimental Marine Biology, Center for Ocean Mega-Science,

12 Institute of Oceanology, Chinese Academy of Sciences,

13 7 Nanhai Road, Qingdao, 266071, China

14 Email: bzliu@qdio.ac.cn

15 Tel.: +86-532-82898696

16 Fax: +86-532-82898578

17

18 **Abstract**

19 Unlike the Hox genes in arthropods and vertebrates, those in molluscs show diverse  
20 expression patterns and, with some exceptions, have generally been described as  
21 lacking the canonical staggered pattern along the anterior-posterior (AP) axis. This  
22 difference is unexpected given that almost all molluscs share highly conserved early  
23 development. Here, we show that molluscan Hox expression can undergo dynamic  
24 changes, which may explain why previous research observed different expression  
25 patterns. Moreover, we reveal that a key character of molluscan Hox expression is that  
26 the dorsal and ventral expression is dissociated. We then deduce a generalized  
27 molluscan Hox expression model, including conserved staggered Hox expression in  
28 the neuroectoderm on the ventral side and lineage-specific dorsal expression that  
29 strongly correlates with shell formation. This generalized model clarifies a  
30 long-standing debate over whether molluscs possess staggered Hox expression and it  
31 can be used to explain the diversification of molluscs. In this scenario, the  
32 dorsoventral dissociation of Hox expression allows lineage-specific dorsal and ventral  
33 patterning in different clades, which may have permitted the evolution of diverse  
34 body plans in different molluscan clades.

35

36 A conserved role of Hox genes in body patterning across bilaterian animals has  
37 been extensively discussed<sup>1-3</sup> and even extended to cnidarians to some extent<sup>4,5</sup>.  
38 However, conservation has limits, and there is considerable variation between animal  
39 lineages in the composition and expression patterns of Hox genes<sup>6-12</sup>. These  
40 differences are particularly evident in Spiralia, which together with Ecdysozoa and  
41 Deuterostomia, forms the three major clades of Bilateria. With the exception of  
42 Annelida, which shows clear canonical staggered Hox expression along the  
43 anterior-posterior (AP) axis (similar to arthropods and vertebrates)<sup>13-15</sup>, staggered Hox  
44 expression has been observed less frequently in spiralian than in other bilaterian  
45 clades<sup>10,11,16,17</sup>.

46 Mollusca is the most species-rich phylum of Spiralia and comprises seven or  
47 eight “class”-grade clades<sup>18-20</sup> (Fig. 1a). Hox expression in molluscs shows diverse  
48 patterns. Although staggered expression has been reported, it is observed in a variety  
49 of tissues in different clades<sup>21-24</sup>. The observation of a staggered Hox pattern in  
50 phylogenetically distant molluscan clades suggests that staggered Hox expression is  
51 widespread in molluscs. However, it remains unclear why such expression has been  
52 observed in some species (polyplacophorans, scaphopods and bivalves)<sup>21-24</sup> but not  
53 others (e.g., in gastropods<sup>25-27</sup> and cephalopods<sup>28</sup>, although evidence has recently  
54 suggested staggered expression in the two clades<sup>23</sup>). In addition, even without seeking  
55 a common staggered pattern, molluscan Hox expression is still too diverse to  
56 conclude a general model. Although correlations between Hox expression and the  
57 larval shell field, foot and nervous system are frequently observed<sup>21-28</sup>, the Hox  
58 expression in these particular organs shows few common patterns except that the  
59 expression in the nervous system in late-stage larvae seems to be common in different  
60 clades<sup>22,23,25,28</sup>.

61 One possible explanation for the diverse Hox expression in molluscs is that the  
62 Hox genes may have been recruited to regulate the development of lineage-specific  
63 structures (lineage novelties). This recruitment might, for example, underpin the roles  
64 of Hox genes in the development and evolution of the brachial crown in

65 cephalopods<sup>28</sup>. However, despite the contribution of lineage-specific expression, the  
66 great diversity of molluscan Hox expression is still unexpected given that all molluscs  
67 share highly similar early development, including spiral cleavage and highly  
68 conserved primary larvae (trochophore) (the conchiferan molluscs also share late  
69 larvae, or veligers)<sup>29-32</sup>. We propose an additional explanation for the diverse  
70 molluscan Hox expression patterns: there could be some “cryptic” similarities in Hox  
71 expression that remain unrevealed. In this scenario, Hox expression may undergo  
72 dynamic changes during development, and different molluscan lineages may share  
73 common expression patterns at particular stages. Dynamic Hox expression in  
74 molluscs is supported by the fact that distinct Hox expression patterns can be  
75 observed at different developmental stages in a single species<sup>23,25</sup>. If correct, such  
76 dynamic expression may explain why staggered expression has been observed in  
77 some species but not in others. Indeed, previous studies on molluscan Hox expression  
78 focused on very different developmental stages<sup>21-28</sup>, which may have contributed to  
79 the poor consistency of the results.

80 To test our hypothesis, it is necessary to investigate Hox gene expression at  
81 multiple developmental stages in individual molluscan species and then compare  
82 expression among different clades. Here, we performed a comprehensive investigation  
83 of various developmental stages of a gastropod mollusc (the limpet *Lottia goshimai*)  
84 (Fig. 1b). We paid special attention to a gastropod species because previous studies on  
85 gastropod Hox expression revealed the most diverse results and a general lack of  
86 staggered expression<sup>25-27</sup>. For comparison, we included a polyplacophoran, the chiton  
87 *Acanthochitona rubrolineata* (Fig. 1c), which belongs to the aculiferan molluscs and  
88 is phylogenetically distant from *L. goshimai* (Fig. 1a).

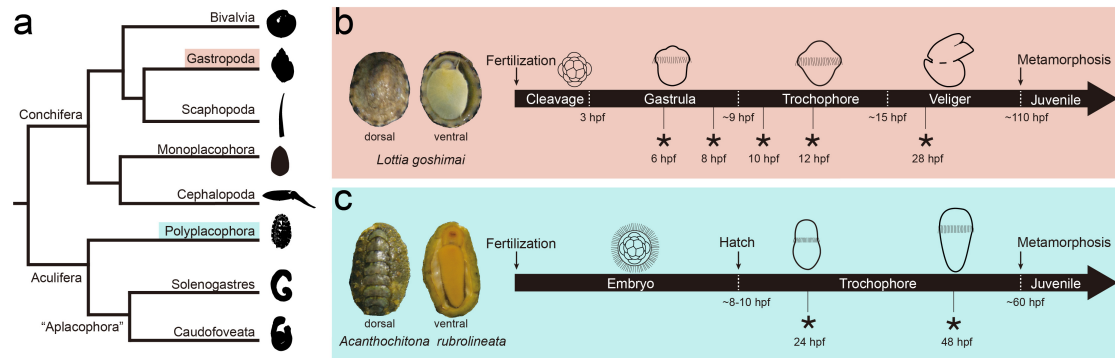

89

90 **Fig. 1 a.** A phylogenetic tree of Mollusca (based on a previous article<sup>18</sup>). The phylogenetic  
91 positions of the two species used in this study (the gastropod and polyplacophoran) are highlighted.  
92 **b and c.** The gastropod *Lottia goshimai* and the polyplacophoran *Acanthochitona rubrolineata*.  
93 The morphology of adults and the timing of development (length not to scale) are shown.  
94 Asterisks indicate the time points at which samples were collected for gene expression analysis in  
95 the present study.

## 96 Results

### 97 The molluscan Hox: general remarks.

98 We identified 11 and 10 Hox genes from the developmental transcriptomes of *L.*  
99 *goshimai* and *Ac. rubrolineata*, respectively (Fig. 4c and supplemental figures  
100 S13-S14). The two species both possessed complete anterior (*hox1-3*) and central  
101 (*hox4-5*, *lox5*, *antp*, *lox4* and *lox2*) classes of Hox genes. For the posterior class, two  
102 genes were identified in *L. goshimai* (*post2* and *post1*), whereas only *post2* was  
103 observed in *Ac. rubrolineata*. No *post1* gene was retrieved when we further searched  
104 against an adult transcriptome. Given that *post1* is also not found in the chiton  
105 *Acanthochitona crinita*<sup>22</sup>, this gene may have been lost in this lineage.

106 In *L. goshimai*, we sampled five developmental stages (two gastrula stages, two  
107 trochophore stages and one veliger stage) in short time intervals (as short as every two  
108 hours) and confirmed that its Hox expression changed rapidly (see Fig. 2 for  
109 examples). These changes correlated with early developmental events, including  
110 gastrulation as well as shell and foot development (supplemental figures S1-S4). In  
111 the late larva (28 hours post fertilization (hpf) veliger), the expression of most Hox  
112 genes was detected in the neural tissues of the foot and internal organs (supplemental

113 figure S5). In *Ac. rubrolineata*, we sampled two larval stages and detected minor  
114 changes in Hox expression. Although other developmental stages (e.g., the embryos  
115 and very early larvae) may exhibit different Hox expression, we believe that the two  
116 stages are sufficiently representative because they showed Hox expression patterns  
117 similar to those of *L. goshimai* (see details below). In the late larva (48 hpf,  
118 comparable to the veliger larva of *L. goshimai*), Hox expression was readily detected  
119 in the shell field in addition to high Hox expression in the neural tissues in the foot.  
120 Other noticeable results included asymmetrical left-right expression and mesodermal  
121 expression of some *L. goshimai* Hox genes. Nevertheless, because we focused on an  
122 inter-species comparison in the present study, we will not describe the details of each  
123 Hox expression pattern here; instead, we provide this information in supplemental  
124 figures S1-S7.

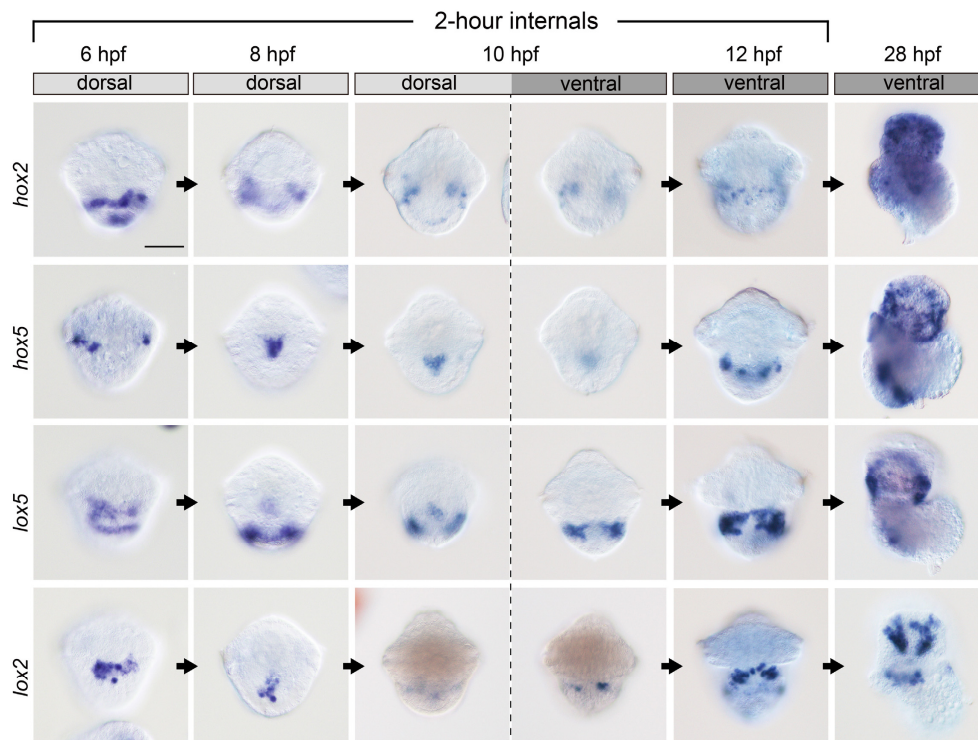

125  
126 **Fig. 2 Hox expression in *L. goshimai* changes rapidly in early development.** Here, four genes  
127 are presented as examples, and information on other genes is provided in supplemental figures  
128 S1-S5. A dorsal view is shown for 6-8 hpf, and a ventral view is shown for 12-28 hpf, as these are  
129 the views showing the greatest Hox expression. Both dorsal and ventral views are shown for 10  
130 hpf. The bar represents 50  $\mu\text{m}$ .

131 **The key characteristic of molluscan Hox expression: dorsoventral dissociation.**

132 After analysing the complex Hox expression at multiple developmental stages,  
133 we concluded that a key characteristic of molluscan Hox expression is the dissociation  
134 of dorsal and ventral expression (see examples in Fig. 3). At a given time point, a Hox  
135 gene can be expressed solely in dorsal or ventral tissues (e.g., *L. goshimai* *hox5* and  
136 *lox4* at 10 hpf, see Fig. 3e, h) or in both tissues while showing distinct expression  
137 patterns (e.g., *L. goshimai* *hox4* at 10 hpf and most *Ac. rubrolineata* Hox genes at 24  
138 hpf, see Fig. 3d, i-u). This spatial dissociation is crucial for recognizing both  
139 conserved and lineage-specific patterns of molluscan Hox expression. As we will  
140 describe in detail below (Figs. 4 and 5), in both molluscan species, ventral Hox  
141 expression may contribute to neuroectoderm/foot development, and dorsal expression  
142 correlates with shell formation.

143 In addition to spatial dissociation, Hox expression in *L. goshimai* also showed  
144 obvious temporal dissociation. As shown in Fig. 3x, the dorsal and ventral expression  
145 showed no obvious correlation in *L. goshimai*, and there was a tendency for earlier  
146 dorsal expression. Most Hox genes were expressed in dorsal tissues at early  
147 developmental stages (6-8 hpf) and were activated in ventral tissues later (after 10  
148 hpf), although the dorsal expression was still sustained to a certain level in late stages  
149 (Fig. 3x and supplemental figures S1-S5). Two exceptions included *antp*, which  
150 showed only ventral expression (in the late larva), and *lox4*, which showed earlier  
151 ventral expression (supplemental figures S2-S5). The dorsal and ventral Hox  
152 expression in *Ac. rubrolineata* did not show temporal dissociation at the two  
153 developmental stages that were investigated (Fig. 3x and supplemental figures S6-S7).

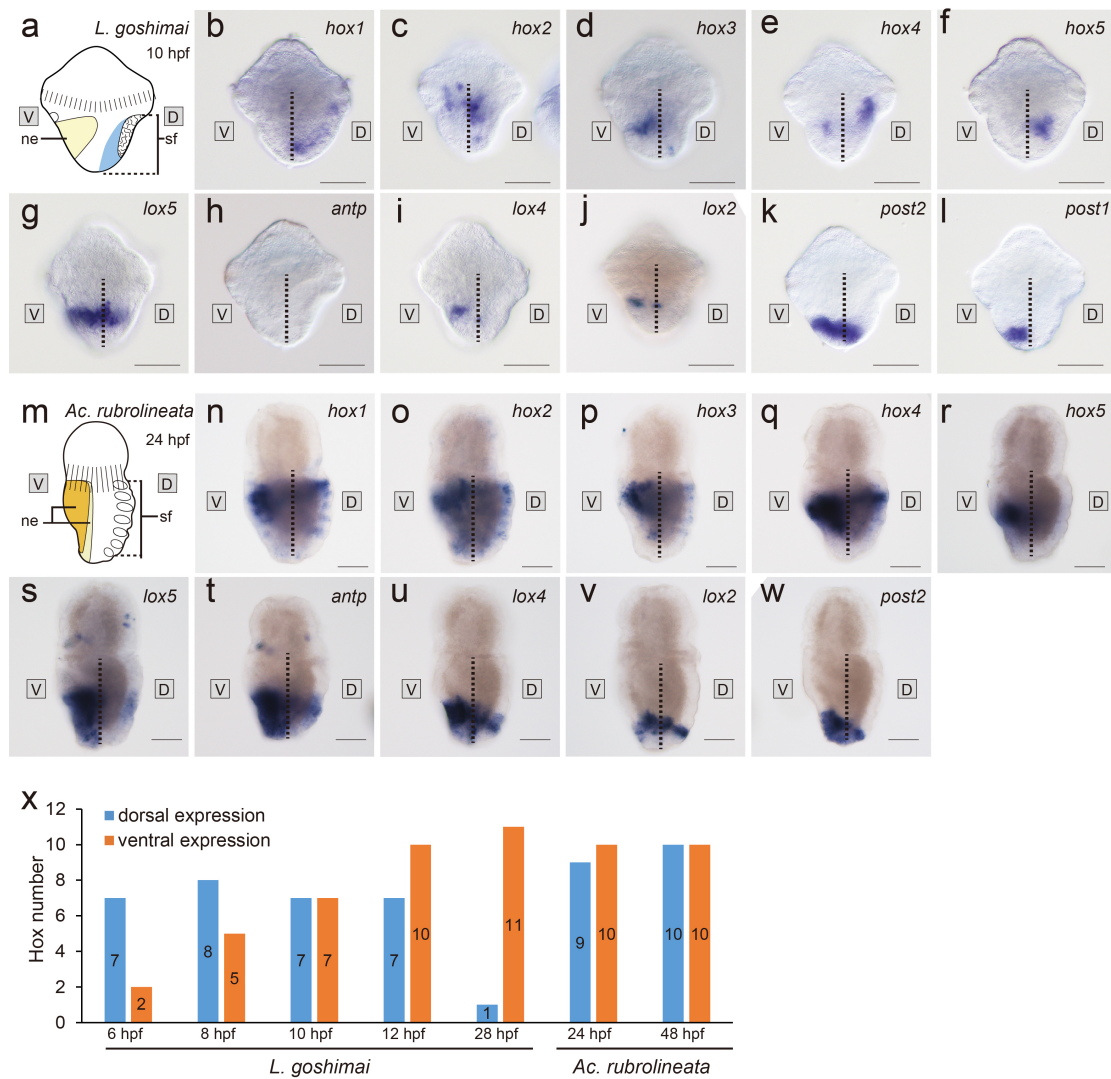

154

155 **Fig. 3 Dorsoventral dissociation of molluscan Hox expression.** All panels except x are lateral

156 views. Spatial dissociation is observed in both species (**b-l**: *L. goshimai*; **n-w**: *Ac. rubrolineata*),

157 while temporal dissociation is observed in *L. goshimai* but not obvious in *Ac. rubrolineata* (**x**).

158 The dashed lines separate the dorsal (D) and ventral (V) parts in panels **b-l** and **n-w**. Panels **a** and

159 **m** show schematics of the trochophore larvae of the two species (lateral view), respectively. ne,

160 neuroectoderm; sf, shell field. Bars represent 50  $\mu$ m. Here, two representative stages (one for each

161 species) are provided as examples, and all data are provided in supplemental figures S1-S7.

162 **Ventral Hox expression: conserved staggered expression in the neuroectoderm.**

163 Ventral Hox expression showed conservation in different molluscan clades and was

164 correlated with the development of the neuroectoderm (the majority of which later

165 developed into the foot). In *Ac. rubrolineata*, ventral Hox expression showed a



166 staggered pattern similar to that previously reported in its close relative (*Ac.*  
167 *crinita*)<sup>21,22</sup>. In *L. goshimai*, despite the quick changes, we recognized a stage when  
168 generally staggered Hox expression could be detected in ventral tissues (early  
169 trochophore 10 hpf, Fig. 4a). In both species, the staggered ventral Hox expression  
170 was along the AP axis according to the sequence of a presumptive Hox cluster (spatial  
171 collinearity) (Fig. 4b, c). We then found that the ventral tissues showing the most Hox  
172 expression in both species were neuroectodermal tissues because they expressed the  
173 pan-neural marker *soxb* (Fig. 4d). In *Ac. rubrolineata*, although a proportion of  
174 ventral signals were observed in subepidermal cells (Fig. 3n-w), these tissues are  
175 likely also neural tissues, because the tissues of its close relative *Ac. crinita* express  
176 the pan-neural marker *elav*<sup>22</sup>. Overall, staggered Hox expression was detected along  
177 the AP axis of the ventral neuroectoderm in both molluscan species, indicating that  
178 Hox genes play conserved roles in neurogenesis.

179       However, Hox expression in the neural tissues of *L. goshimai* lost its staggered  
180 pattern in as little as two hours (from 10 to 12 hpf, see Fig. 2 and supplemental figures  
181 S3-S4) and exhibited no obvious relationship with the AP axis in later larvae  
182 (supplemental figures S4-S5). This finding demonstrates that staggered Hox  
183 expression is restricted to the early phase of neurogenesis in *L. goshimai*. In *Ac.*  
184 *rubrolineata*, the staggered expression in ventral tissues was stable at the two stages  
185 examined (supplemental figures S6-S7).

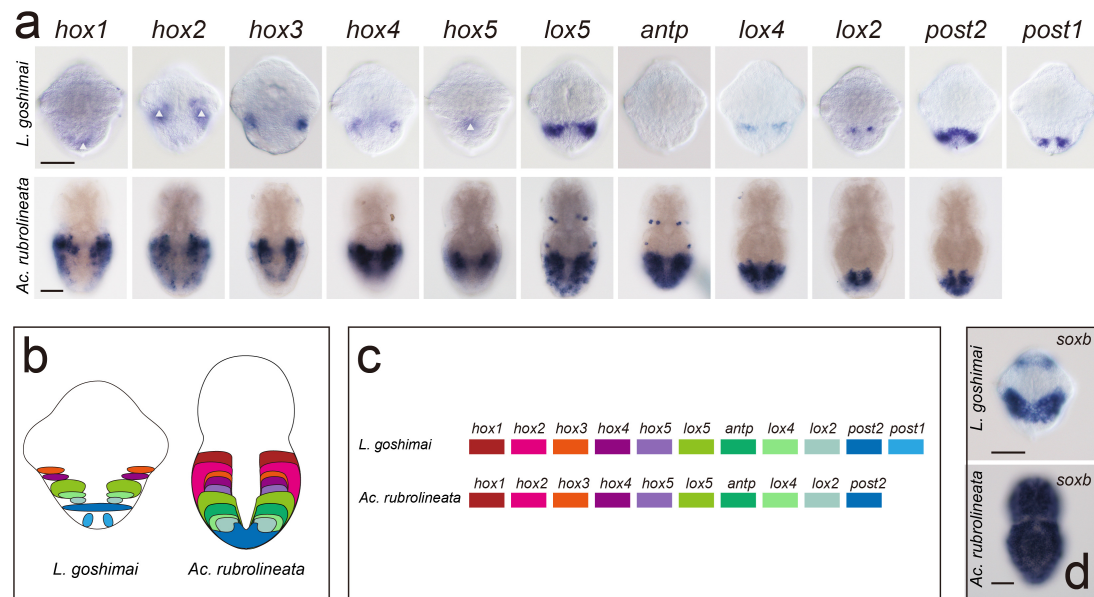

186

187 **Fig. 4 Conserved staggered Hox expression along the AP axis of the neuroectoderm.** The  
 188 larvae are at the same stage as in Fig. 3a-w, and all panels are ventral views. Panel **a** shows the  
 189 Hox expression in the trochophores of *L. goshimai* and *Ac. rubrolineata*. Schematic diagrams are  
 190 presented in **b** that show the staggered Hox expression along the AP axis according to a  
 191 presumptive Hox cluster (**c**). Note that expression of *hox1*, *hox2* and *hox5* of *L. goshimai* (white  
 192 triangles) is not neuroectodermal and expression of *antp* is not detectable (see details in  
 193 supplemental figure S3). Panel **d** shows the *soxb* expression in the two species, indicative of the  
 194 neuroectoderm. In *L. goshimai*, *soxb* expression does not cover the most posterior ectoderm that  
 195 expresses *post2* and *post1*. Bars represent 50  $\mu$ m.

196 **Dorsal Hox expression: tight correlation with the shell field.**

197 Although highly conserved staggered expression was detected in ventral tissues,  
 198 dorsal Hox expression showed few common characteristics. Nevertheless, we noticed  
 199 that dorsal Hox expression correlated with shell development in a lineage-specific  
 200 manner. To provide comparable descriptions, we use the term “shell field” to refer to  
 201 the whole area of the dorsal ectoderm that contributes to shell development, although  
 202 this term may have had more specific meanings in previous literature<sup>33</sup>. In *L.*  
 203 *goshimai*, the trochophore larva (10 hpf) possessed a single round shell plate (Fig. 5a).  
 204 In accordance, *hox1-3* were expressed in a circular (or partially circular) pattern that

205 surrounded the shell field (Fig. 5d-f). The other three genes, namely, *hox4*, *hox5* and  
206 *lox5*, were expressed in the central regions of the shell field (Fig. 5g-i). An association  
207 between the shell field and more Hox expression was detected in other developmental  
208 stages. In earlier stages (6- and/or 8-hpf gastrulae), the expression of *lox2* was  
209 detected in the dorsal ectoderm and thus may play a role in shell-field patterning  
210 (supplemental figures S1-S2). In the later trochophore larva (12 hpf), although the  
211 *hox3* expression in the shell field vanished, expression of *lox4*, *lox2* and *post2* in the  
212 leading edge of the shell field was evident (supplemental figure S4). In general, most  
213 Hox genes of *L. goshimai* showed a correlation with the shell field on the dorsal side  
214 at particular developmental stages.

215 In *Ac. rubrolineata*, in accordance with its larval shell field being composed of  
216 seven repeated shell plates/pseudosegments (Fig. 5b, c), *hox1-5* and *lox2* were  
217 expressed in particular bands in the dorsal ectoderm (Fig. 5j-o, j'-o'). For each of the  
218 other Hox genes, the expression covered a continuous region of the dorsal ectoderm,  
219 and a specific correlation between the expression and the shell field was difficult to  
220 determine (supplemental figures S6-S7). In summary, similar to the expression in *L.*  
221 *goshimai*, the dorsal Hox expression in *Ac. rubrolineata* also showed a tight  
222 correlation to the shell field, while the correlation was more specific for *hox1-5* and  
223 *lox2* and less specific for the other Hox genes.

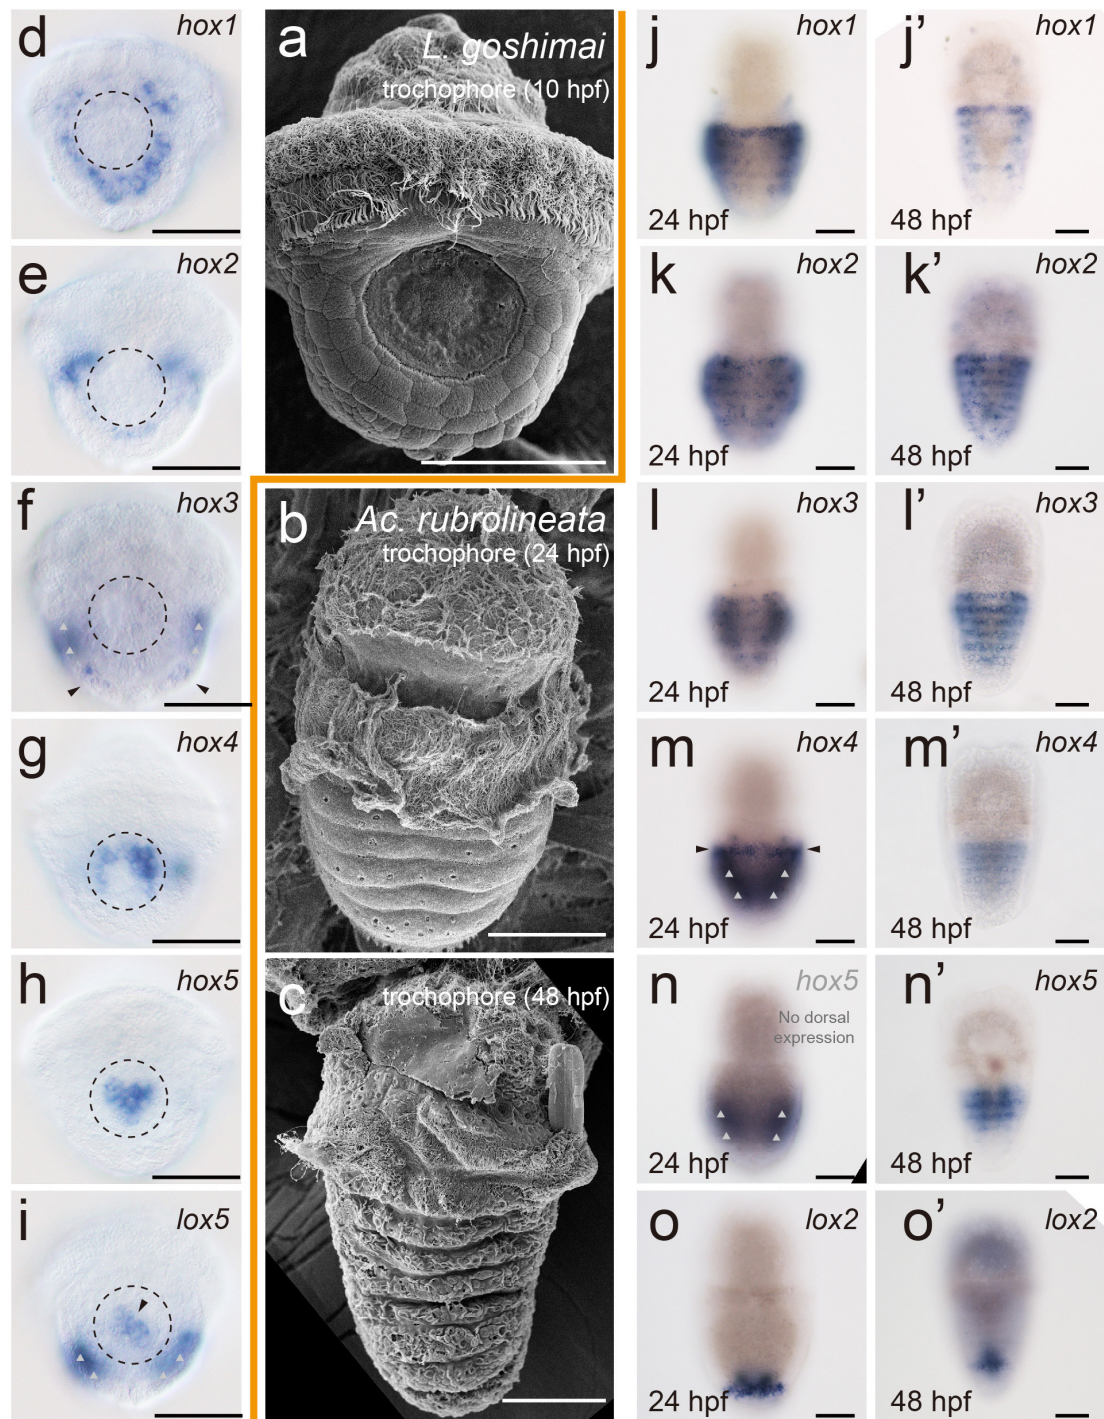

224

225 Fig. 5 Dorsal Hox expression was correlated with the lineage-specific shell field in *L.*  
 226 *goshimai* and *Ac. rubrolineata*. Most larvae are at the same developmental stage as in Fig. 3a-w  
 227 (except **j'-o'**), and all panels are dorsal views. Panels (**a-c**) show the scanning electronic  
 228 microscope images of the larvae of the two species. The round shell plate in *L. goshimai* (**a**) and  
 229 the seven pseudosegments where the shell plates will form in *Ac. rubrolineata* (**b-c**) are easily  
 230 distinguished. The dashed circles in **d-i** indicate the shell field. In some panels (**f, i, m** and **n**), the

231 dorsal and ventral expression is indicated by black arrowheads and grey triangles, respectively,  
232 since the ventral expression is very intense and may interfere with the discrimination between  
233 dorsal and ventral expression. See the text and supplemental figures S1-S7 for dorsal expression  
234 of other Hox genes. Bars represent 50  $\mu\text{m}$ .

## 235 **Discussion**

### 236 **A generalized model of molluscan *Hox* expression.**

237 From our results, we deduce a generalized model of molluscan Hox expression  
238 based on dissociated dorsal and ventral expression. First, ventral Hox expression  
239 shows a conserved staggered pattern at particular developmental stages (i.e., during  
240 early neuroectoderm patterning). Second, dorsal Hox expression correlates with the  
241 shell field and is highly lineage-specific. Lastly, in later larval stages of conchiferans,  
242 most Hox genes are exclusively expressed in the nervous system (yet no longer in a  
243 staggered manner). By closely examining previous reports, we conclude that this  
244 generalized model is compatible with known Hox expression data from various  
245 molluscan clades. It is particularly evident in the scaphopod *Antalis entalis*, in which  
246 Hox expression at most developmental stages has been reported<sup>23</sup>. Hox expression in  
247 this species matches the generalized model, including the staggered ventral expression  
248 in early larvae (mid-trochophore), evident expression in the shell field at early stages,  
249 and exclusive neural expression in later larvae (in a non-staggered manner)<sup>23</sup>. In the  
250 polyplacophoran *Ac. crinita*, ventral expression in the neural tissues and dorsal  
251 expression in the shell field have also been described separately, although the  
252 dorsoventral dissociation was not emphasized<sup>21,22</sup>. Particular aspects of Hox  
253 expression have been reported in other species, which are actually snapshots of the  
254 generalized model, including the expression in the brachial crown (the modified foot)  
255 and the nervous system in the embryos of the cephalopod *Euprymna scolopes*<sup>28</sup>, the  
256 dorsal expression in the shell field of the gastrula in the bivalve *Patinopecten*  
257 *yessoensis*<sup>24</sup>, and the neural expression in the late larvae in the gastropod *Haliotis*  
258 *asinina*<sup>25</sup>. The only species whose Hox expression does not match the model is the  
259 gastropod *Gibbula varia*<sup>26,27</sup>. Given that Hox expression in *G. varia* shows very

260 uncommon characteristics (*e.g.*, expression in the prototroch or velum<sup>27</sup>, which is  
261 never observed in other molluscs), further investigations on more developmental  
262 stages of *G. varia* and more gastropod species are needed to explain these unusual  
263 Hox expression patterns.

264 Based on these results, we propose that the relatively quick changes in molluscan  
265 Hox expression, in particular in conchiferans, have obscured the commonalities  
266 among different clades and that the dorsoventral dissociation further adds to the  
267 complexity. Although Hox expression has been described in much detail in previous  
268 studies, a generalized model has not been uncovered, likely because these studies  
269 focused on a single species and/or investigated limited developmental stages, making  
270 them insufficient for cross-species comparisons.

#### 271 **Molluscan Hox genes: roles in neurogenesis and shell formation.**

272 The molluscan dorsal and ventral Hox expression patterns, despite their  
273 dissociation, indicate roles of Hox genes in neurogenesis and shell formation. The  
274 staggered expression in ventral neural tissues is reminiscent of the conserved  
275 staggered Hox expression in the nervous system of other bilaterian clades<sup>9,34,35</sup>. The  
276 potential roles of Hox genes in molluscan neurogenesis is consistent with a conserved  
277 mechanism of early neural patterning involving Hox genes in a wide range of animal  
278 lineages<sup>36,37</sup>. Moreover, because a large proportion of the neuroectoderm contributes  
279 to foot development, the roles of Hox genes in molluscan foot development are also  
280 indicated. On the dorsal side, although Hox expression in the shell field is frequently  
281 observed, the particular genes showing this expression pattern vary greatly among  
282 different clades<sup>21,23,25,26</sup>. While expression of most Hox genes can be detected in the  
283 shell field of the polyplacophoran *Ac. crinita*<sup>21,22</sup>, shell-field expression was limited to  
284 a small number of Hox genes in conchiferan molluscs (gastropod, bivalve and  
285 scaphopod)<sup>23,24,26</sup>. Here, we show that, similar to polyplacophorans, the expression of  
286 most Hox genes can be detected in the gastropod shell field at particular  
287 developmental stages. This result indicates that the involvement of Hox genes in  
288 shell-field patterning is far greater than previously realized and thus suggests a deep

289 integration of Hox functions in molluscan shell development. The expression of more  
290 Hox genes in the shell field of other conchiferans is expected to be revealed as more  
291 developmental stages are investigated.

292 Lastly, although we use the general terms dorsal and ventral patterning for  
293 convenience, caution should be taken when discussing specific processes. Referring to  
294 these processes more generally as neural and non-neural patterning may be preferred.  
295 Posterior ectoderm patterning should also be paid special attention because, in  
296 particular species (e.g., *L. goshimai*), this region, unlike other ventral tissues, may not  
297 contain neuroectodermal tissues (indicated by the lack of *soxb* expression, see Fig. 4d)  
298 and does not exhibit the same obvious dorsoventral dissociation of Hox gene  
299 expression (Fig. 3k-l).

### 300 **The dissociated *Hox* expression in molluscs: evolutionary implications.**

301 Given that Hox genes play important roles in body patterning and that molluscan  
302 Hox expression shows both conserved and lineage-specific characteristics, this  
303 generalized Hox expression model provides useful information for inferring how  
304 diverse body plans evolved in molluscs. The expression data strongly suggest that the  
305 Hox genes contributed to patterning the nervous system (foot) ventrally and the shell  
306 field dorsally in the last common ancestor of molluscs. Nevertheless, regardless of the  
307 particular pattern (i.e., dorsal or ventral expression), we propose that the most  
308 important part is the dissociation itself because it allows the potential lineage-specific  
309 dorsal or ventral patterning, which may underlie the vast diversity of molluscan body  
310 plans. For instance, as we propose in Fig. 6, dorsal pseudosegments may have been  
311 formed in the lineage leading to polyplacophorans (assuming a non-segmented  
312 molluscan ancestor), and the dorsal part would have rotated in the lineage leading to  
313 gastropods. The unique shell shapes and structures in bivalves, scaphopods and  
314 cephalopods as well as the sclerites in aplacophorans represent other types of  
315 diversified dorsal structures (Fig. 6). Similarly, the diverse foot types in bivalves,  
316 scaphopods, cephalopods and aplacophorans might result from the lineage-specific  
317 patterning of the primitive ventral foot in the common molluscan ancestor that is

318 likely still maintained in monoplacophorans, gastropods and polyplacophorans (Fig.  
319 6). This lineage-specific ventral patterning does not contradict the conserved  
320 staggered Hox expression observed in early neurogenesis because this pattern can  
321 disappear quickly (e.g., in *L. goshimai*), and ventral Hox expression exhibits  
322 lineage-specific characteristics later in development. Together, the dissociated dorsal  
323 and ventral Hox expression, in combination with the robust involvement of Hox genes  
324 in morphogenesis, may underpin the diversification of the molluscan body plans.

325 In addition to spatial dissociation, dorsal and ventral Hox expression also  
326 exhibited obvious temporal dissociation in *L. goshimai* (earlier dorsal expression).  
327 Similar earlier dorsal Hox expression has also been observed in a scaphopod<sup>23</sup> and  
328 likely in a bivalve (solely dorsal expression at the early gastrula stage)<sup>24</sup>. Considering  
329 the speculated functions of Hox genes in the shell field and neuroectoderm/foot on the  
330 dorsal and ventral sides, respectively, the temporal dissociation of Hox expression  
331 suggests temporally dissociated dorsal and ventral patterning. Indeed, the earlier  
332 dorsal Hox expression in the three molluscan clades coincides with the bias towards  
333 earlier dorsal development in which the dorsal structure (shell field) develops earlier  
334 than the ventral structure (foot) (Fig. 6, inserts iii-v). In *L. goshimai*, this bias is  
335 reflected by *post1* expression that separates the dorsal and ventral tissues. When the  
336 shell field on the dorsal side expands quickly and encloses the larval body during the  
337 period from the gastrula to early veliger larvae, the ventral neuroectoderm/foot anlage  
338 remains small (supplemental figure S8). Such an earlier dorsal developmental strategy  
339 may provide survival advantages because it results in the quick formation of a large  
340 larval shell that can protect the larva from external threats. This developmental  
341 strategy seems to be common in indirectly developed conchiferans but not in  
342 aculiferans (compare inserts iii-v and i-ii in Fig. 6). The temporal dissociation of  
343 dorsal and ventral patterning represents a type of heterochrony and may contribute to  
344 the plasticity of developmental strategies in molluscan evolution.

345



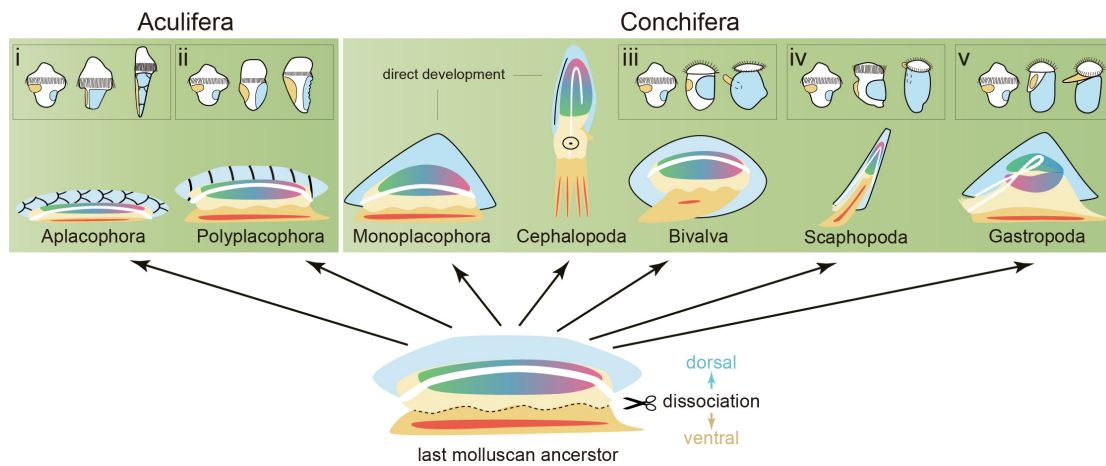

346

347 **Fig. 6 Evolutionary implications of dissociated dorsal and ventral patterning in molluscs.**

348 Spatially dissociated dorsal and ventral patterning may contribute to the diversity of the body

349 plans characteristic of lineage-specific dorsal tissues (blue) and ventral tissues (orange). The

350 nervous system (red) derived from the embryonic neuroectoderm is incorporated into the ventral

351 tissues. Moreover, in conchiferans, the temporally dissociated dorsal and ventral patterning may

352 allow earlier dorsal development and generate early larvae with large shells that can enclose the

353 whole body (iii-v), which is not observed in aculiferans (i-ii). The diagrams of the larvae of

354 aplacophorans and scaphopods are derived from previous studies<sup>23,38</sup>.

355 **Common staggered hox expression in other spiralian.**

356 Similar to Hox expression in molluscs, Hox expression in other spiralian

357 (except annelids) also shows diverse patterns and generally lacks staggered

358 expression<sup>10,11,16,17,39</sup>. The demonstration of the dissociated Hox expression in dorsal

359 and ventral tissues in molluscs provides a novel perspective for analysing spiralian

360 Hox expression. Therefore, we re-analysed published data with the aim of recovering

361 potential common characteristics (e.g., staggered expression) of spiralian Hox

362 expression. When focusing on the ventral side, we recognized strikingly common

363 staggered Hox expression at particular developmental stages of various spiralian,

364 such as a rotifer<sup>11</sup>, nemertean<sup>39</sup> and brachiopod<sup>16</sup> (Fig. 7 and supplemental figures

365 S9-S11). In annelids, although researchers have paid more attention to staggered Hox

366 expression in segments, Hox expression is often observed in ventral tissues before

367 segment formation<sup>13,14,40,41</sup>. To the best of our knowledge, the only two exceptions are

368 the platyhelminth *Schmidtea*<sup>10</sup> and the nemertean *Micrura*<sup>17</sup>, which may be due to the  
369 very unusual development of the animals (asexual reproduction in *Schmidtea* and the  
370 highly modified larval type in *Micrura*). As in molluscs, the ventral tissues of these  
371 spiralian showing staggered Hox expression are all neural tissues<sup>11,13,14,16,39-41</sup> (in  
372 brachiopods, this idea was suggested subsequently by showing expression of neural  
373 patterning genes<sup>42</sup>). This result indicates that staggered Hox expression is largely  
374 maintained in various spiralian, which has long been debated. Similar to chordates<sup>43</sup>,  
375 combined Hox expression patterns including conserved staggered expression in AP  
376 patterning of neural tissues and extra expression in lineage-specific features seem to  
377 be widespread in spiralian lineages, indicating the roles of Hox genes in the evolution  
378 of the diverse spiralian body plans.

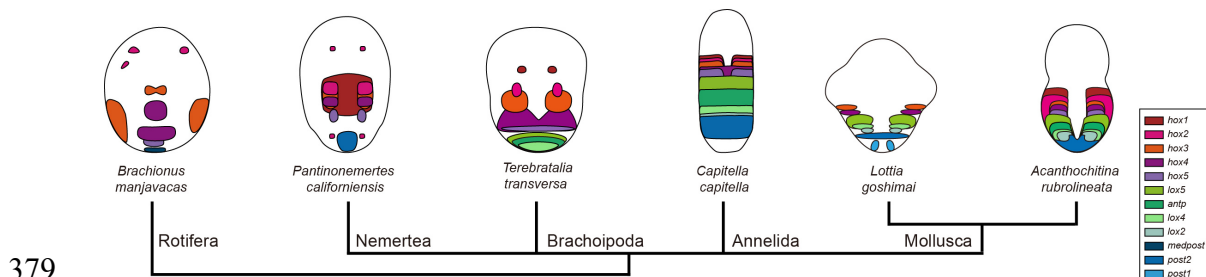

380 **Fig. 7 Staggered Hox expression in neural tissues in spiralian.** The schematic diagrams of the  
381 rotifer, nemertean, brachiopod and annelid are derived from published data, and the details are  
382 provided in supplemental figures S9-S12.

## 383 **Methods**

384 **Animals and larvae collection.** Adults of *L. goshimai* Nakayama, Sasaki & Nakano,  
385 2017 and *Ac. rubrolineata* (Lischke, 1873) were collected from intertidal rocks in  
386 Qingdao, China. Spawning occurred after the animals were transferred to the  
387 laboratory. For *L. goshimai*, which spawned relatively quickly after collection, each  
388 adult was placed into a single 100-ml cup for gamete collection. Artificial fertilization  
389 was conducted by mixing sperm and oocyte suspensions, and the fertilized eggs were  
390 cultured at 25°C. This procedure ensured the precise description of their  
391 developmental stages by referring to hpf. For *Ac. rubrolineata*, whose spawning was  
392 unpredictable, multiple individuals were put into the same container (20-25°C), and

393 the embryos or larvae were collected on the second day. The developmental stages of  
394 the larvae were estimated based on their morphological characteristics. Trochophore  
395 larvae at two stages were used, which corresponded to the larvae ~24 hpf and ~48 hpf  
396 when cultured at 25°C (metamorphosis occurred 60-72 hpf). Specimens at the  
397 designated developmental stages of the two species (asterisks in Fig. 1b, c) were fixed  
398 in 4% paraformaldehyde in PBS containing 100 mM EDTA and 0.1% Tween-20 (pH  
399 7.4). The veliger larvae of *L. goshimai* were anaesthetized by adding 1M magnesium  
400 chloride solution before fixation.

401 **Genes.** Hox and SoxB genes were retrieved from the developmental transcriptomes of  
402 the two species by a BLAST search. Gene orthologies were verified by phylogenetic  
403 analysis (supplemental figures S13 and S15). For the Hox genes, characteristic  
404 residues of each orthologue were examined to confirm their orthologies as previously  
405 described<sup>44,45</sup> (supplemental figure S14).

406 **In situ hybridization.** Gene-specific primers containing a T7 promoter sequence  
407 (taatacgaactcactataggg) were used to amplify the cDNA fragment of each gene. The  
408 resultant PCR products were used as templates in subsequent in vitro transcription to  
409 synthesize the digoxigenin-labelled probes. In situ hybridization was performed as  
410 previously described<sup>24</sup> except that, after specimen rehydration, an additional protease  
411 K treatment was performed (20 min at room temperature with continuous shaking)  
412 before the incubation in 1% triethanolamine. Different concentrations of protease K  
413 (diluted in PBST) were used for different specimens: 25 µg/ml for *L. goshimai*  
414 embryos (8 hpf and before) and early larva (10 hpf), 50 µg/ml for *L. goshimai*  
415 mid-larvae (12 and 14 hpf) and all *Ac. rubrolineata* larvae, 75 µg/ml for *L. goshimai*  
416 late larvae (17 and 28 hpf).

417 **Scanning electronic microscopy.** The specimens were fixed in 2.5% glutaraldehyde  
418 at 4°C overnight and then dehydrated in 100% ethanol. Drying, coating and  
419 observations under a scanning electronic microscope were performed as described  
420 previously<sup>46</sup>.

421

422 **Data availability**

423 *L. goshimai* and *Ac. rubrolineata* sequence data generated during the current  
424 study have been deposited in GenBank with the primary accession numbers  
425 [MK637053](#) to [MK637075](#).

426 **Acknowledgements**

427 We thank Peter W. H. Holland for thoughtful discussions and critical revisions of  
428 the manuscript. Sincere thanks are due to Andreas Hejnol, Gregory A. Wray, Fei Xu  
429 and Lingyu Wang for suggestions on the manuscript. We thank Junlong Zhang for  
430 assistance in sample collection and species identification and for providing some of  
431 the included images of molluscs. We thank Weihong Yang for performing some of the  
432 in situ hybridization experiments. The study was funded by National Key R&D  
433 Program of China (2018YFD0900104) grant to P.H., the Marine S&T Fund of  
434 Shandong Province for Pilot National Laboratory for Marine Science and Technology  
435 (Qingdao) (2018SDKJ0302-1) grant to B.L., the China Agriculture Research System  
436 (CARS-49) grant to B.L. and the National Natural Science Foundation of China  
437 (41776157) grant to P.H.

438 **Author contributions**

439 B.L. and P.H. conceived the project. P.H. collected animals, cloned Hox genes  
440 and interpreted the primary data, including concluding the generalized molluscan Hox  
441 expression model, proposing the hypothesis of molluscan body-plan diversification  
442 and perceiving the staggered Hox expression in non-mollusc spiralian. Q.W.  
443 performed the in situ hybridization experiments, record raw images, cloned SoxB  
444 genes and contributed to animal collection. P.H. and Q.W. prepared the figures. S.T.  
445 contributed to the experiment design by speculating dynamic Hox expression. P.H.  
446 wrote the manuscript. B.L. oversaw the whole project, contributed to data analysis  
447 and critically revised the manuscript. All authors discussed the results and commented  
448 on the manuscript.

449 **References**

450 1 Garcia-Fernàndez, J. The genesis and evolution of homeobox gene clusters.

- 451 *Nature Reviews Genetics* **6**, 881-892, doi:10.1038/nrg1723 (2005).
- 452 2 Pearson, J. C., Lemons, D. & McGinnis, W. Modulating Hox gene functions  
453 during animal body patterning. *Nature Reviews Genetics* **6**, 893-904,  
454 doi:10.1038/nrg1726 (2005).
- 455 3 Holland, P. W. H. Evolution of homeobox genes. *Wiley Interdisciplinary Reviews:*  
456 *Developmental Biology* **2**, 31-45, doi:10.1002/wdev.78 (2013).
- 457 4 Dubuc, T. Q., Stephenson, T. B., Rock, A. Q. & Martindale, M. Q. Hox and Wnt  
458 pattern the primary body axis of an anthozoan cnidarian before gastrulation. *Nature*  
459 *Communications* **9**, doi:10.1038/s41467-018-04184-x (2018).
- 460 5 Kroesen, A. E. *et al.* An axial Hox code controls tissue segmentation and body  
461 patterning in *Nematostella vectensis*. *Science* **361**, 1377-1380,  
462 doi:10.1126/science.aar8384 (2018).
- 463 6 Cj, K. *et al.* The dance of the Hox genes - Patterning the anteroposterior body  
464 axis of *Caenorhabditis elegans*. *Cold Spring Harbor Symposia on Quantitative*  
465 *Biology* **62**, 293-305 (1998).
- 466 7 Aronowicz, J. & Lowe, C. J. Hox gene expression in the hemichordate  
467 *Saccoglossus kowalevskii* and the evolution of deuterostome nervous systems.  
468 *Integrative and Comparative Biology* **46**, 890-901, doi:10.1093/icb/icl045 (2006).
- 469 8 Tsuchimoto, J. & Yamaguchi, M. Hox expression in the direct-type developing  
470 sand dollar *Peronella japonica*. *Developmental Dynamics* **243**, 1020-1029,  
471 doi:10.1002/dvdy.24135 (2014).
- 472 9 Hejnal, A. & Martindale, M. Q. Coordinated spatial and temporal expression of  
473 Hox genes during embryogenesis in the acoel *Convolutriloba longifissura*. *BMC*  
474 *Biology* **7**, 65-65, doi:10.1186/1741-7007-7-65 (2009).
- 475 10 Currie, K. W. *et al.* HOX gene complement and expression in the planarian  
476 *Schmidtea mediterranea*. *EvoDevo* **7**, 7-7, doi:10.1186/s13227-016-0044-8 (2016).
- 477 11 Fröbuis, A. C. & Funch, P. Rotiferan Hox genes give new insights into the  
478 evolution of metazoan bodyplans. *Nature Communications* **8**,  
479 doi:10.1038/s41467-017-00020-w (2017).

- 480 12 Papillon, D., Perez, Y., Fasano, L., Le Parco, Y. & Caubit, X. Hox gene survey in  
481 the chaetognath *Spadella cephaloptera*: evolutionary implications. *Development*  
482 *Genes and Evolution* **213**, 142-148, doi:10.1007/s00427-003-0306-z (2003).
- 483 13 Kulakova, M. *et al.* Hox gene expression in larval development of the  
484 polychaetes *Nereis virens* and *Platynereis dumerilii* (Annelida, Lophotrochozoa).  
485 *Development Genes and Evolution* **217**, 39-54, doi:10.1007/s00427-006-0119-y  
486 (2006).
- 487 14 Fröblius, A. C., Matus, D. Q. & Seaver, E. C. Genomic organization and  
488 expression demonstrate spatial and temporal Hox gene colinearity in the  
489 lophotrochozoan *Capitella sp. I*. *PLoS ONE* **3**, doi:10.1371/journal.pone.0004004  
490 (2008).
- 491 15 Irvine, S. Q. & Martindale, M. Q. Expression patterns of anterior Hox genes in  
492 the polychaete *chaetopterus*: Correlation with morphological boundaries.  
493 *Developmental Biology* **217**, 333-351, doi:10.1006/dbio.1999.9541 (2000).
- 494 16 Schiemann, S. M. *et al.* Clustered brachiopod Hox genes are not expressed  
495 collinearly and are associated with lophotrochozoan novelties. *Proceedings of the*  
496 *National Academy of Sciences* **114**, E1913-E1922, doi:10.1073/pnas.1614501114  
497 (2017).
- 498 17 Hiebert, L. S. & Maslakova, S. A. Hox genes pattern the anterior-posterior axis of  
499 the juvenile but not the larva in a maximally indirect developing invertebrate, *Micrura*  
500 *alaskensis* (Nemertea). *BMC Biology* **13**, doi:10.1186/s12915-015-0133-5 (2015).
- 501 18 Smith, S. A. *et al.* Resolving the evolutionary relationships of molluscs with  
502 phylogenomic tools. *Nature* **480**, 364-367, doi:10.1038/nature10526 (2011).
- 503 19 Haszprunar, G. & Wanninger, A. Molluscs. *Current Biology* **22**, R510-R514,  
504 doi:10.1016/j.cub.2012.05.039 (2012).
- 505 20 Wanninger, A. & Wollesen, T. The evolution of molluscs. *Biological Reviews* **94**,  
506 102-115, doi:10.1111/brv.12439 (2019).
- 507 21 Fritsch, M., Wollesen, T., de Oliveira, A. L. & Wanninger, A. Unexpected  
508 co-linearity of Hox gene expression in an aculiferan mollusk. *BMC Evolutionary*

- 509 *Biology* **15**, doi:10.1186/s12862-015-0414-1 (2015).
- 510 22 Fritsch, M., Wollesen, T. & Wanninger, A. Hox and ParaHox gene expression in  
511 early body plan patterning of polyplacophoran mollusks. *Journal of Experimental*  
512 *Zoology Part B: Molecular and Developmental Evolution* **326**, 89-104,  
513 doi:10.1002/jez.b.22671 (2016).
- 514 23 Wollesen, T., Rodríguez Monje, S. V., de Oliveira, A. L. & Wanninger, A.  
515 Staggered Hox expression is more widespread among molluscs than previously  
516 appreciated. *Proceedings of the Royal Society B* **285**, 20181513-20181513,  
517 doi:10.1098/rspb.2018.1513 (2018).
- 518 24 Wang, S. *et al.* Scallop genome provides insights into evolution of bilaterian  
519 karyotype and development. *Nature Ecology & Evolution* **1**, 0120-0120,  
520 doi:10.1038/s41559-017-0120 (2017).
- 521 25 Hinman, V. F., O'Brien, E. K., Richards, G. S. & Degnan, B. M. Expression of  
522 anterior Hox genes during larval development of the gastropod *Haliotis asinina*.  
523 *Evolution and Development* **5**, 508-521, doi:10.1046/j.1525-142X.2003.03056.x  
524 (2003).
- 525 26 Samadi, L. & Steiner, G. Involvement of Hox genes in shell morphogenesis in the  
526 encapsulated development of a top shell gastropod (*Gibbula varia* L.). *Development*  
527 *Genes and Evolution* **219**, 523-530, doi:10.1007/s00427-009-0308-6 (2009).
- 528 27 Samadi, L. & Steiner, G. Expression of Hox genes during the larval development  
529 of the snail, *Gibbula varia* (L.)-further evidence of non-colinearity in molluscs.  
530 *Development Genes and Evolution* **220**, 161-172, doi:10.1007/s00427-010-0338-0  
531 (2010).
- 532 28 Lee, P. N., Callaerts, P., De Couet, H. G. & Martindale, M. Q. Cephalopod Hox  
533 genes and the origin of morphological novelties. *Nature* **424**, 1061-1065,  
534 doi:10.1038/nature01872 (2003).
- 535 29 Henry, J. J. & Martindale, M. Q. Conservation and innovation in spiralian  
536 development. *Hydrobiologia* **402**, 255-265, doi:10.1023/a:1003756912738 (1999).
- 537 30 Hejnol, A. A twist in time-the evolution of spiral cleavage in the light of animal

- 538 phylogeny. *Integrative and Comparative Biology* **50**, 695-706, doi:10.1093/icb/icq103  
539 (2010).
- 540 31 Lambert, J. D. Developmental Patterns in Spiralian Embryos. *Current Biology* **20**,  
541 R72-R77, doi:10.1016/j.cub.2009.11.041 (2010).
- 542 32 Nielsen, C. Some aspects of spiralian development. *Acta Zoologica* **91**, 20-28,  
543 doi:10.1111/j.1463-6395.2009.00421.x (2010).
- 544 33 Jackson, D. J. & Degnan, B. M. The importance of evo-devo to an integrated  
545 understanding of molluscan biomineralisation. *Journal of Structural Biology* **196**,  
546 67-74, doi:10.1016/j.jsb.2016.01.005 (2016).
- 547 34 Kourakis, M. J. *et al.* Conserved anterior boundaries of Hox gene expression in  
548 the central nervous system of the leech *Helobdella*. *Developmental Biology* **190**,  
549 284-200, doi:10.1006/dbio.1997.8689 (1997).
- 550 35 Serano, J. M. *et al.* Comprehensive analysis of Hox gene expression in the  
551 amphipod crustacean *Parhyale hawaiensis*. *Developmental Biology* **409**, 297-309,  
552 doi:10.1016/j.ydbio.2015.10.029 (2016).
- 553 36 Arendt, D., Tosches, M. A. & Marlow, H. From nerve net to nerve ring, nerve  
554 cord and brain-evolution of the nervous system. *Nature Reviews Neuroscience* **17**,  
555 61-72, doi:10.1038/nrn.2015.15 (2016).
- 556 37 Hartenstein, V. & Stollewerk, A. The evolution of early neurogenesis.  
557 *Developmental Cell* **32**, 390-407, doi:10.1016/j.devcel.2015.02.004 (2015).
- 558 38 Todt, C. & Wanninger, A. Of tests, trochs, shells, and spicules: Development of  
559 the basal mollusk *Wirenia argentea* (Solenogastres) and its bearing on the evolution of  
560 trochozoan larval key features. *Frontiers in zoology* **7**, 6-6,  
561 doi:10.1186/1742-9994-7-6 (2010).
- 562 39 Hiebert, L. S. & Maslakova, S. A. Expression of Hox, Cdx, and Six3/6 genes in  
563 the hoplonemertean *Pantionemertes californiensis* offers insight into the evolution of  
564 maximally indirect development in the phylum Nemertea. *EvoDevo* **6**, 1-15,  
565 doi:10.1186/s13227-015-0021-7 (2015).
- 566 40 Irvine, S. Q. & Martindale, M. Q. Comparative analysis of hox gene expression in



- 567 the polychaete *Chaetopterus*. *Library* **651**, 640-651 (2001).
- 568 41 Kourakis, M. J. & Martindale, M. Q. Hox gene duplication and deployment in the  
569 annelid leech *Helobdella*. *Evolution and Development* **3**, 145-153,  
570 doi:10.1046/j.1525-142X.2001.003003145.x (2001).
- 571 42 Martín-Durán, J. M. *et al.* Convergent evolution of bilaterian nerve cords. *Nature*  
572 **553**, 45-50, doi:10.1038/nature25030 (2018).
- 573 43 Lappin, T. R. J., Grier, D. G., Thompson, A. & Halliday, H. L. HOX genes:  
574 Seductive science, mysterious mechanisms. *Ulster Medical Journal* **75**, 23-31 (2006).
- 575 44 Balavoine, G., De Rosa, R. & Adoutte, A. Hox clusters and bilaterian phylogeny.  
576 *Molecular Phylogenetics and Evolution* **24**, 366-373,  
577 doi:10.1016/s1055-7903(02)00237-3 (2002).
- 578 45 Pérez-Parallé, M. L., Pazos, A. J., Mesías-Gansbiller, C. & Sánchez, J. L. Hox,  
579 Parahox, Ehgbox, and NK Genes in Bivalve Molluscs: Evolutionary Implications.  
580 *Journal of Shellfish Research* **35**, 179-190, doi:10.2983/035.035.0119 (2016).
- 581 46 Tan, S., Huan, P. & Liu, B. Expression patterns indicate that BMP2/4 and  
582 Chordin, not BMP5-8 and Gremlin, mediate dorsal-ventral patterning in the mollusk  
583 *Crassostrea gigas*. *Development Genes And Evolution* **227**, 75-84 (2017).
- 584
- 585
